# Supplementary material for: Synthesis of salt-stable fluorescent nanoparticles (quantum dots) by polyextremophile halophilic bacteria
Source: PubMed Central journal article supplement (PMC6374371; doi:10.1038/s41598-018-38330-8), 2019-02-13
Supplement: 41598_2018_38330_MOESM1_ESM.pdf [file 41598_2018_38330_MOESM1_ESM.pdf]

## Synthesis of salt-stable fluorescent nanoparticles (quantum dots) by polyextremophile halophilic bacteria

Bruna N<sup>1</sup>., Collao B<sup>1</sup>., Tello A<sup>1,2</sup>., Caravantes P<sup>1</sup>., Díaz-Silva N<sup>1</sup>., Monrás JP<sup>1</sup>., Órdenes-Aenishanslins N<sup>1</sup>., Flores M<sup>3</sup>., Espinoza-Gonzalez R<sup>3</sup>., Bravo D<sup>4</sup> and Pérez-Donoso JM<sup>1\*</sup>

1.- BioNanotechnology and Microbiology Lab, Center for Bioinformatics and Integrative Biology (CBIB), Universidad Andres Bello, Santiago, Chile.

2.- Laboratorio de Nanotecnología, Recursos Naturales y Sistemas Complejos, Facultad de Ciencias Naturales, Departamento de Química y Biología, Universidad de Atacama, Copiapó, Chile.

3.- Departamento de Ingeniería Química, Biotecnología y Materiales, Facultad de Ciencias Físicas y Matemáticas, Universidad de Chile, Santiago, Chile.

4.- Laboratorio de Microbiología Oral, Facultad de Odontología, Universidad de Chile, Santiago, Chile.

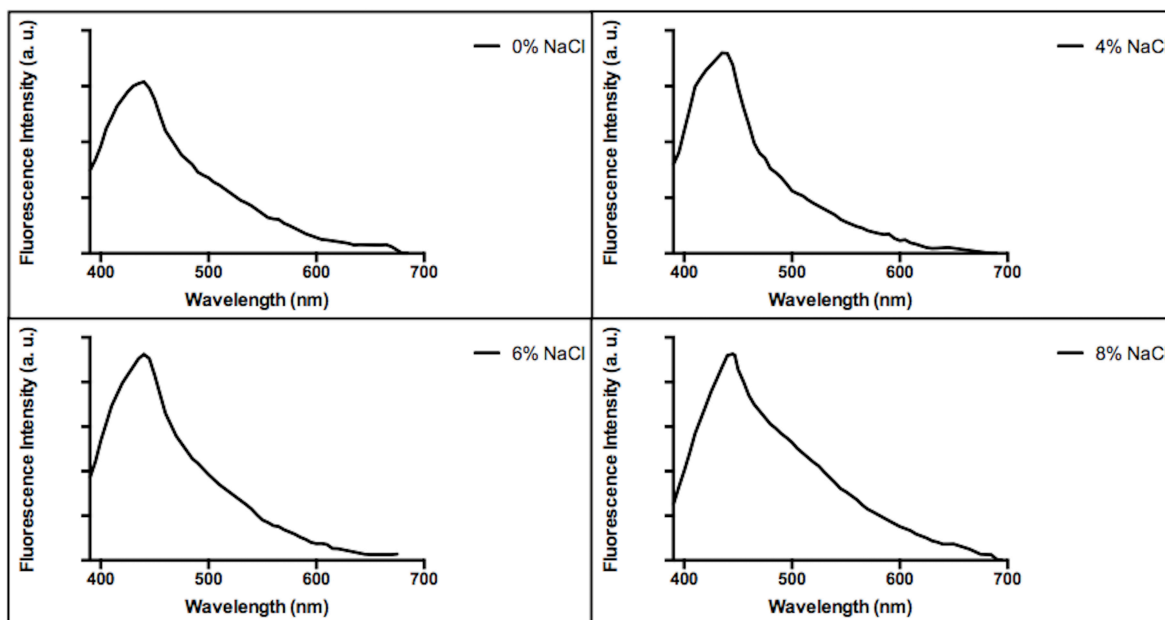

Figure S1. Emission spectra of QDs synthesized by *Halobacillus* sp. DS2 in presence of different NaCl concentrations (3 h biosynthesis).
